# Supplementary material for: Potentially Inappropriate Prescribing of Oral Solid Medications in Elderly Dysphagic Patients
Source: Pharmaceutics. 2018 Dec 16;10(4):280. doi: 10.3390/pharmaceutics10040280 (PMC6321461; doi:10.3390/pharmaceutics10040280)
Supplement: Supplementary file 1 [file pharmaceutics-10-00280-s001.pdf]

## Supplementary Tables S1a-S1d

**Table S1a:** Complete list of all the prescriptions considered as inappropriate drug association (IDA) at admission and discharge. N° represents the number of patients having this prescription, API is the active pharmaceutical ingredient, DF is the dosage forms, and Note report the reason of inappropriateness.

| Admission |                          |    |                            | Discharge                                  |     |    |      |
|-----------|--------------------------|----|----------------------------|--------------------------------------------|-----|----|------|
| N°        | API                      | DF | Note                       | N°                                         | API | DF | Note |
| 1         | Olanzapine-Alprazolam    |    | X grade Lexicomp® database | No inappropriate drug association detected |     |    |      |
| 2         | Clopidogrel-Esomeprazole |    | X grade Lexicomp® database |                                            |     |    |      |
| 2         | Quetiapine-Tetrabenazine |    | X grade Lexicomp® database |                                            |     |    |      |

**Table S1b:** Complete list of all the prescriptions considered as inappropriate drug for dysphagic patients (IDDP) at admission and discharge. N° represents the number of patients having this prescription, API is the active pharmaceutical ingredient, DF is the dosage forms, and Note report the reason of inappropriateness.

| Admission |                            |                        |               | Discharge |                |                      |               |
|-----------|----------------------------|------------------------|---------------|-----------|----------------|----------------------|---------------|
| N°        | API                        | DF                     | Note*         | N°        | API            | DF                   | Note*         |
| 5         | Olanzapine                 | Orodispersible tablets | A + B + C + D | 4         | Quetiapine     | Conventional tablets | A + B + C + D |
| 4         | Quetiapine                 | Conventional tablets   | A + B + C + D | 1         | Fentanyl       | Transdermal patch    | A + D         |
| 2         | Doxazosine                 | Conventional tablets   | A             | 1         | Glycopyrronium | Dry powder inhaler   | A             |
| 1         | Alprazolam                 | liquid dosage form     | A + B         | 1         | Risperidone    | Liquid dosage form   | A + B + C + D |
| 1         | Fentanyl                   | Transdermal patch      | A + D         |           |                |                      |               |
| 1         | Glycopyrronium             | Dry powder inhaler     | A             |           |                |                      |               |
| 1         | Mirtazapine                | Orodispersible tablets | A + B + D     |           |                |                      |               |
| 1         | Paroxetine                 | Liquid dosage form     | A + B         |           |                |                      |               |
| 1         | Perindopril and Indapamide | Conventional tablets   | A             |           |                |                      |               |
| 1         | Risperidone                | Liquid dosage form     | A + B + C + D |           |                |                      |               |
| 1         | Donperidone                | Liquid dosage form     | A + C         |           |                |                      |               |
| 1         | Clonidine                  | Transdermal patch      | A             |           |                |                      |               |

\* A = Dry mouth.

B = Detrimental effects on consciousness or oropharyngeal swallow response.

C = Hyperfunctional involuntary movements (dyskinesia) of the oral pharyngeal musculature, rigidity and spasm of the pharyngeal musculature.

D = Sedation.

**Table S1c:** Complete list of all the prescriptions considered as inappropriate dosage form (IDF) at admission and discharge. N° represents the number of patients having this prescription, API is the active pharmaceutical ingredient, DF is the dosage forms, and Note report the reason of inappropriateness.

| Admission |                           |                                   |                                                                     | Discharge |                          |                                   |                                                                     |
|-----------|---------------------------|-----------------------------------|---------------------------------------------------------------------|-----------|--------------------------|-----------------------------------|---------------------------------------------------------------------|
| N°        | API                       | DF                                | Note                                                                | N°        | API                      | DF                                | Note                                                                |
| 16        | Furosemide                | Conventional tablets or Injection | Available as liquid oral dosage form.                               | 14        | Furosemide               | Conventional tablets or Injection | Available as liquid dosage form.                                    |
| 3         | Lansoprazole              | Enteric tablets                   | Available as orodispersible tablets.                                | 7         | Lansoprazolo             | Enteric tablets                   | Available as orodispersible tablets.                                |
| 3         | Levothyroxine             | Conventional tablets              | Available as liquid dosage form.                                    | 3         | Losartan                 | Conventional tablets              | Available as liquid dosage form.                                    |
| 2         | Polyethylene Glycol 3350  | Powder for water dispersion*      | Available as liquid dosage form.                                    | 2         | Ciprofloxacin            | Conventional tablets              | Available as liquid dosage form.                                    |
| 2         | Valproate                 | Conventional tablets              | Available as liquid dosage form.                                    | 2         | Levodopa/carbidopa       | Conventional tablets              | Water dispersible tablets                                           |
| 1         | Codeine and Acetaminophen | Conventional tablets              | Available as granules for oral Suspension.                          | 2         | Levothyroxine            | Conventional tablets              | Available as liquid dosage form.                                    |
| 1         | Domperidone               | Conventional tablets              | Available as liquid dosage form.                                    | 2         | Polyethylene Glycol 3350 | Powder for water dispersion*      | Available as liquid dosage form.                                    |
| 1         | Esomeprazole              | Water dispersible tablets**       | Available as water dispersible powder dosage form.                  | 1         | Esomeprazole             | Water dispersible tablets**       | Available as water dispersible powder dosage form.                  |
| 1         | Phenobarbital             | Conventional tablets              | Available as injection                                              | 1         | Phenobarbital            | Conventional tablets              | Available as injection                                              |
| 1         | Lormetazepam              | Conventional tablets              | Available as liquid dosage form.                                    | 1         | Lormetazepam             | Conventional tablets              | Available as liquid dosage form.                                    |
| 1         | Losartan                  | Conventional tablets              | Available as liquid dosage form.                                    | 1         | Mirtazapine              | Conventional tablets              | Available as orodispersible tablets.                                |
| 1         | Acetaminophen             | Conventional tablets              | Available as granules for oral Suspension and effervescent tablets. | 1         | Olanzapine               | Conventional Tablets              | Available as orodispersible tablets.                                |
| 1         | Digoxin                   | Conventional tablets              | Available as liquid dosage form.                                    | 1         | Acetaminophen            | Injection                         | Available as granules for oral Suspension and effervescent tablets. |

|   |                          |                      |                                      |   |            |                      |                                  |
|---|--------------------------|----------------------|--------------------------------------|---|------------|----------------------|----------------------------------|
| 1 | Promazine                | Injection            | Available as liquid dosage form.     | 1 | Paroxetine | Conventional Tablets | Available as liquid dosage form. |
| 1 | Cefixime                 | Conventional tablets | Available as orodispersible tablets. | 1 | Trazodone  | Conventional Tablets | Available as liquid dosage form. |
| 1 | Levodopa and Benserazide | Conventional tablets | Water dispersible tablets            |   |            |                      |                                  |
| 1 | Torasemide               | Conventional tablets | Available as injection               |   |            |                      |                                  |

\* Polyethylene glycol 3350 dispersible powder is not indicated for PWD due the high water amount necessary for the reconstitution (> 100 mL). The concentrated liquid formulation is strongly suggested for PWD.

\*\* In PWD requiring jellified vehicles, Nexium® granules is the most suitable formulation; while Nexium® tablets are appropriate for patients under enteral nutrition (see manufacturer information).

**Table S1d:** Complete list of all the prescriptions considered as inappropriate dosage form modification (IDM) at admission and discharge. N° represents the number of patients having this prescription, API is the active pharmaceutical ingredient, DF is the dosage forms, and Note report the reason of inappropriateness.

| Admission |                      |                           |                                      | Discharge |                      |                           |                                      |
|-----------|----------------------|---------------------------|--------------------------------------|-----------|----------------------|---------------------------|--------------------------------------|
| N°        | API                  | DF                        | Note                                 | N°        | API                  | DF                        | Note                                 |
| 10        | Pantoprazole         | Enteric tablets           | Unstable in the gastric environment. | 5         | Lansoprazole         | Enteric tablets           | Unstable in the gastric environment. |
| 8         | Acetylsalicylic acid | Enteric tablets           | harmful for gastric mucosa.          | 4         | Pantoprazole         | Enteric tablets           | Unstable in the gastric environment. |
| 4         | Lansoprazole         | Enteric tablets           | Unstable in the gastric environment  | 3         | Tamsulosin           | Extended release capsules | Drug overdose                        |
| 4         | Trazodone            | Extended release tablets  | Drug overdose                        | 2         | Acetylsalicylic acid | Enteric tablets           | Unstable in the gastric environment. |
| 3         | Iron sulfate         | Enteric tablets           | harmful for gastric mucosa.          | 2         | Oxycodone /Naloxone  | Extended release tablets  | Drug overdose                        |
| 2         | Tamsulosin           | Extended release capsules | Drug overdose                        | 1         | Valproate            | Extended release tablets  | Drug overdose                        |
| 2         | Isosorbide           | Extended release tablets  | Drug overdose                        | 1         | Biperiden            | Extended release tablets  | Drug overdose                        |
| 1         | Nifedipine           | Extended release tablets  | Drug overdose                        | 1         | Dabigatran           | Capsules                  | Drug overdose                        |
| 1         | Biperiden            | Extended release tablets  | Drug overdose                        | 1         | Nifedipine           | Extended release tablets  | Drug overdose                        |
| 1         | Oxycodone / Naloxone | Extended release tablets  | Drug overdose                        | 1         | Trazodone            | Extended release tablets  | Drug overdose                        |
| 1         | Venlafaxine          | Extended release tablets  | Drug overdose                        |           |                      |                           |                                      |
